# Supplementary material for: BODIPY–diketopyrrolopyrrole–porphyrin conjugate small molecules for use in bulk heterojunction solar cells
Source: Royal Society of Chemistry journal article supplement (doi:10.1039/c8ta01291a), 2018-01-01
Supplement: c8ta01291a1.pdf [file c8ta01291a1.pdf]

## Supporting Information

### BODIPY-diketopyrrolopyrrole-porphyrin Conjugate Small Molecules for Use in Bulk Heterojunction Solar Cells

L. Bucher, N. Desbois, E. N. Koukaras, C. H. Devillers, S. Biswas, G. D. Sharma, and C. P. Gros

#### Table of contents

|                 |                                                                                                                                                                                                                                                                                                                                                                                                                                                                                                |      |
|-----------------|------------------------------------------------------------------------------------------------------------------------------------------------------------------------------------------------------------------------------------------------------------------------------------------------------------------------------------------------------------------------------------------------------------------------------------------------------------------------------------------------|------|
| <b>Fig. S1</b>  | Synthesis of porphyrin <b>3</b>                                                                                                                                                                                                                                                                                                                                                                                                                                                                | p. 3 |
| <b>Fig. S2</b>  | Absorption spectra of all compounds in THF at 298 K                                                                                                                                                                                                                                                                                                                                                                                                                                            | p. 3 |
| <b>Fig. S3</b>  | Absorption (black line), emission (red, green and purple lines) and excitation (blue line) spectra of <b>BD-pPor</b> (a) in 2-MeTHF and (c) in thin film, and <b>BD-tPor</b> (b) in 2-MeTHF and (d) in thin film, *artefact from excitation beam ( $2\lambda_{\text{ex}}$ harmonic)                                                                                                                                                                                                            | p. 4 |
| <b>Fig. S4</b>  | Cyclic voltammograms of <b>BD-pPor</b> (black curve) and <b>BD-tPor</b> (red curve) as thin films in 0.1 M TBAPF <sub>6</sub> MeCN solution (scan rate = 1 V.s <sup>-1</sup> )                                                                                                                                                                                                                                                                                                                 | p. 4 |
| <b>Fig. S5</b>  | Cyclic voltammograms (in black) and DPV curves (in red, intensities of all DPV curves have been multiplied by a factor of 2) for <b>BD-tPor</b> (top) and <b>BD-pPor</b> (bottom) in CH <sub>2</sub> Cl <sub>2</sub> 0.1 M TBAPF <sub>6</sub> ([ <b>BD-tPor</b> ]= $4\times 10^{-4}$ M and [ <b>BD-pPor</b> ]= $2\times 10^{-4}$ M, WE: Pt Ø=1 mm, CE: Pt, RE: SCE, $\nu = 100$ mV/s (CV) and 10 mV/s (DPV) respectively; subtract 0.46 V to get the potential values vs. Fc/Fc <sup>+</sup> ) | p. 5 |
| <b>Fig. S6</b>  | <sup>1</sup> H NMR spectrum (CDCl <sub>3</sub> , 500 MHz) of porphyrin <b>3</b>                                                                                                                                                                                                                                                                                                                                                                                                                | p. 6 |
| <b>Fig. S7</b>  | <sup>13</sup> C NMR spectrum (CDCl <sub>3</sub> , 125 MHz) of porphyrin <b>3</b>                                                                                                                                                                                                                                                                                                                                                                                                               | p. 6 |
| <b>Fig. S8</b>  | JMOD <sup>13</sup> C NMR spectrum (CDCl <sub>3</sub> , 125 MHz) of porphyrin <b>3</b>                                                                                                                                                                                                                                                                                                                                                                                                          | p. 7 |
| <b>Fig. S9</b>  | LRMS MALDI/TOF spectrum of <b>3</b> (full)                                                                                                                                                                                                                                                                                                                                                                                                                                                     | p. 7 |
| <b>Fig. S10</b> | HRMS MALDI/TOF spectrum of <b>3</b> (zoom)                                                                                                                                                                                                                                                                                                                                                                                                                                                     | p. 8 |
| <b>Fig. S11</b> | <sup>1</sup> H NMR spectrum (CDCl <sub>3</sub> , 300 MHz) of <b>4</b>                                                                                                                                                                                                                                                                                                                                                                                                                          | p. 8 |
| <b>Fig. S12</b> | LRMS MALDI/TOF spectrum of <b>4</b> (full)                                                                                                                                                                                                                                                                                                                                                                                                                                                     | p. 9 |

|                 |                                                                                                                                 |       |
|-----------------|---------------------------------------------------------------------------------------------------------------------------------|-------|
| <b>Fig. S13</b> | HRMS MALDI/TOF spectrum of <b>4</b> (zoom)                                                                                      | p. 9  |
| <b>Fig. S14</b> | <sup>1</sup> H NMR spectrum (CDCl <sub>3</sub> , 500 MHz) of <b>5</b>                                                           | p. 10 |
| <b>Fig. S15</b> | LRMS MALDI/TOF spectrum of <b>5</b> (full)                                                                                      | p. 10 |
| <b>Fig. S16</b> | HRMS MALDI/TOF spectrum of <b>5</b> (zoom)                                                                                      | p. 11 |
| <b>Fig. S17</b> | <sup>1</sup> H NMR spectrum (CDCl <sub>3</sub> , 500 MHz) of <b>BD-pPor</b>                                                     | p. 11 |
| <b>Fig. S18</b> | LRMS MALDI/TOF spectrum of <b>BD-pPor</b> (full)                                                                                | p. 12 |
| <b>Fig. S19</b> | HRMS MALDI/TOF spectrum of <b>BD-pPor</b> (zoom)                                                                                | p. 12 |
| <b>Fig. S20</b> | <sup>1</sup> H NMR spectrum (CDCl <sub>3</sub> , 500 MHz) of <b>BD-tPor</b>                                                     | p. 13 |
| <b>Fig. S21</b> | LRMS MALDI/TOF spectrum of <b>BD-tPor</b> (full)                                                                                | p. 13 |
| <b>Fig. S22</b> | HRMS MALDI/TOF spectrum of <b>BD-tPor</b> (zoom)                                                                                | p. 14 |
| <b>Fig. S23</b> | Theoretical UV/Vis absorption spectrum of (a) <b>BD-pPor</b> and (b) <b>BD-tPor</b><br>(calculated using the B3LYP functional). | p. 14 |
| <b>Fig. S24</b> | Optical absorption spectra of (a) <b>BD-pPor</b> :PC <sub>71</sub> BM and (b) <b>BD-tPor</b> :PC <sub>71</sub> BM thin films    | p. 15 |
| <b>Table S1</b> | Electronic excitations of <b>BD-pPor</b>                                                                                        | p. 16 |
| <b>Table S2</b> | Electronic excitations of <b>BD-tPor</b>                                                                                        | p. 17 |

---

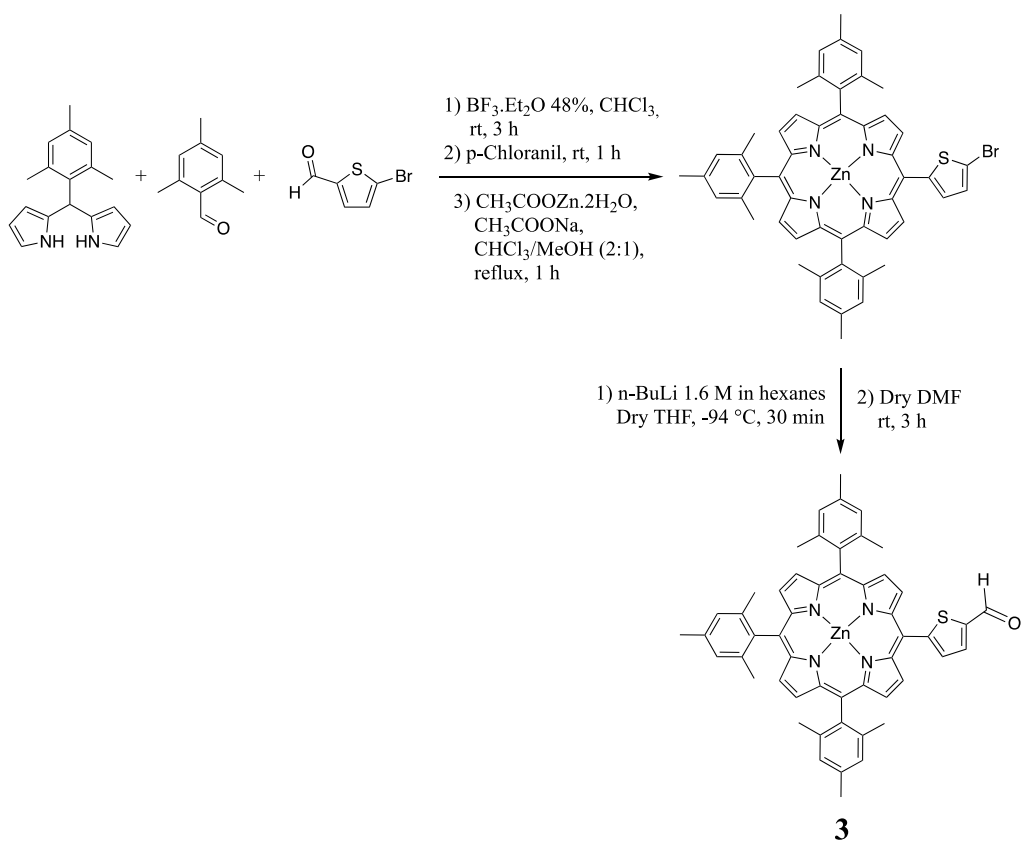

**Fig. S1.** Synthesis of porphyrin **3**

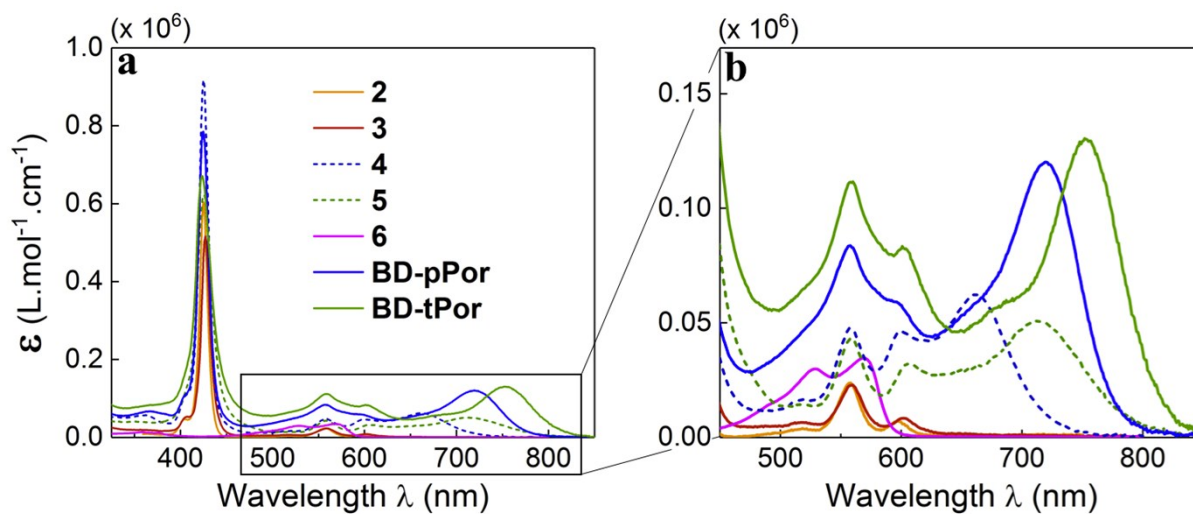

**Fig. S2.** a) Absorption spectra of all compounds in THF at 298 K,  
 zoom on the 560 - 850 nm region

b)

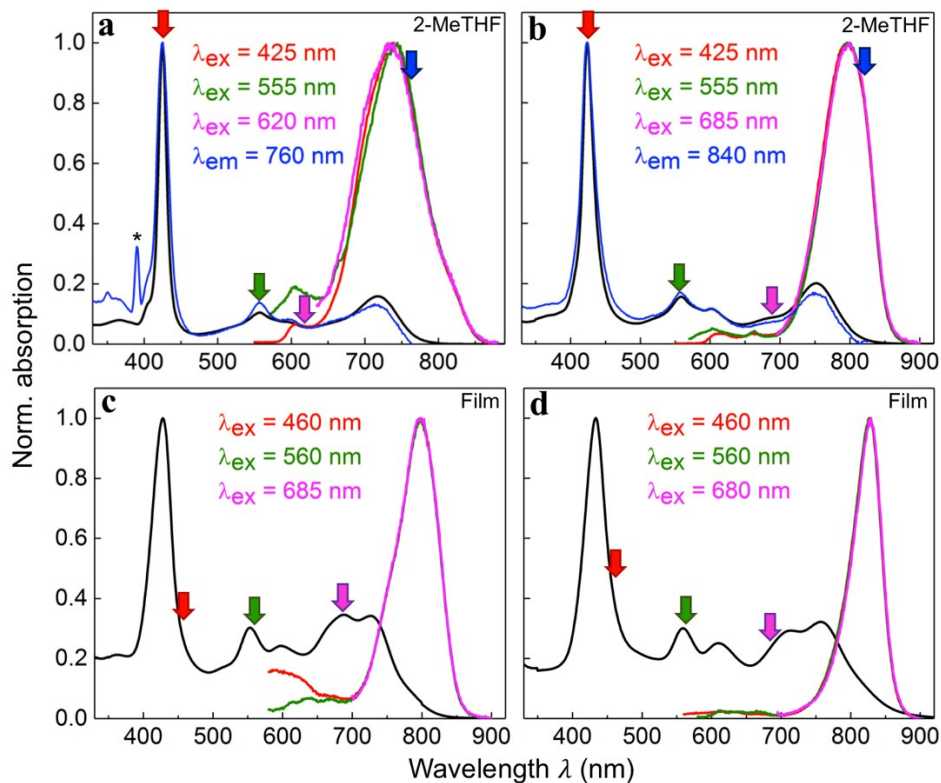

**Fig. S3.** Absorption (black line), emission (red, green and purple lines) and excitation (blue line) spectra of **BD-pPor** (a) in 2-MeTHF and (c) in thin film, and **BD-tPor** (b) in 2-MeTHF and (d) in thin film, \*artefact from excitation beam ( $2\lambda_{\text{ex}}$  harmonic)

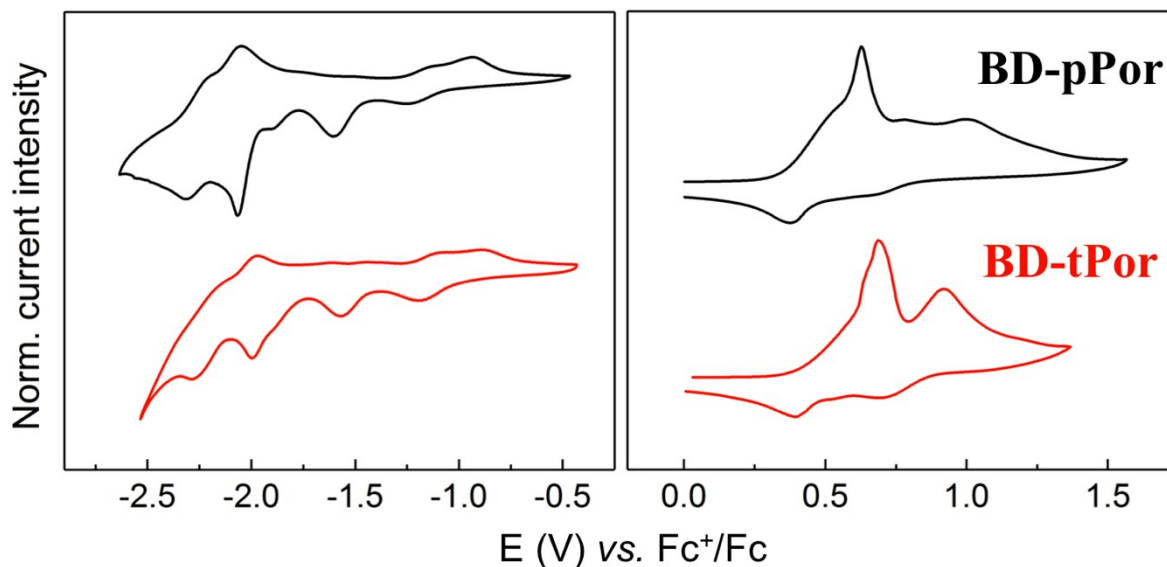

**Fig. S4.** Cyclic voltammograms of **BD-pPor** (black curve) and **BD-tPor** (red curve) as thin films in 0.1 M TBAPF<sub>6</sub> MeCN solution (scan rate = 1 V·s<sup>-1</sup>)

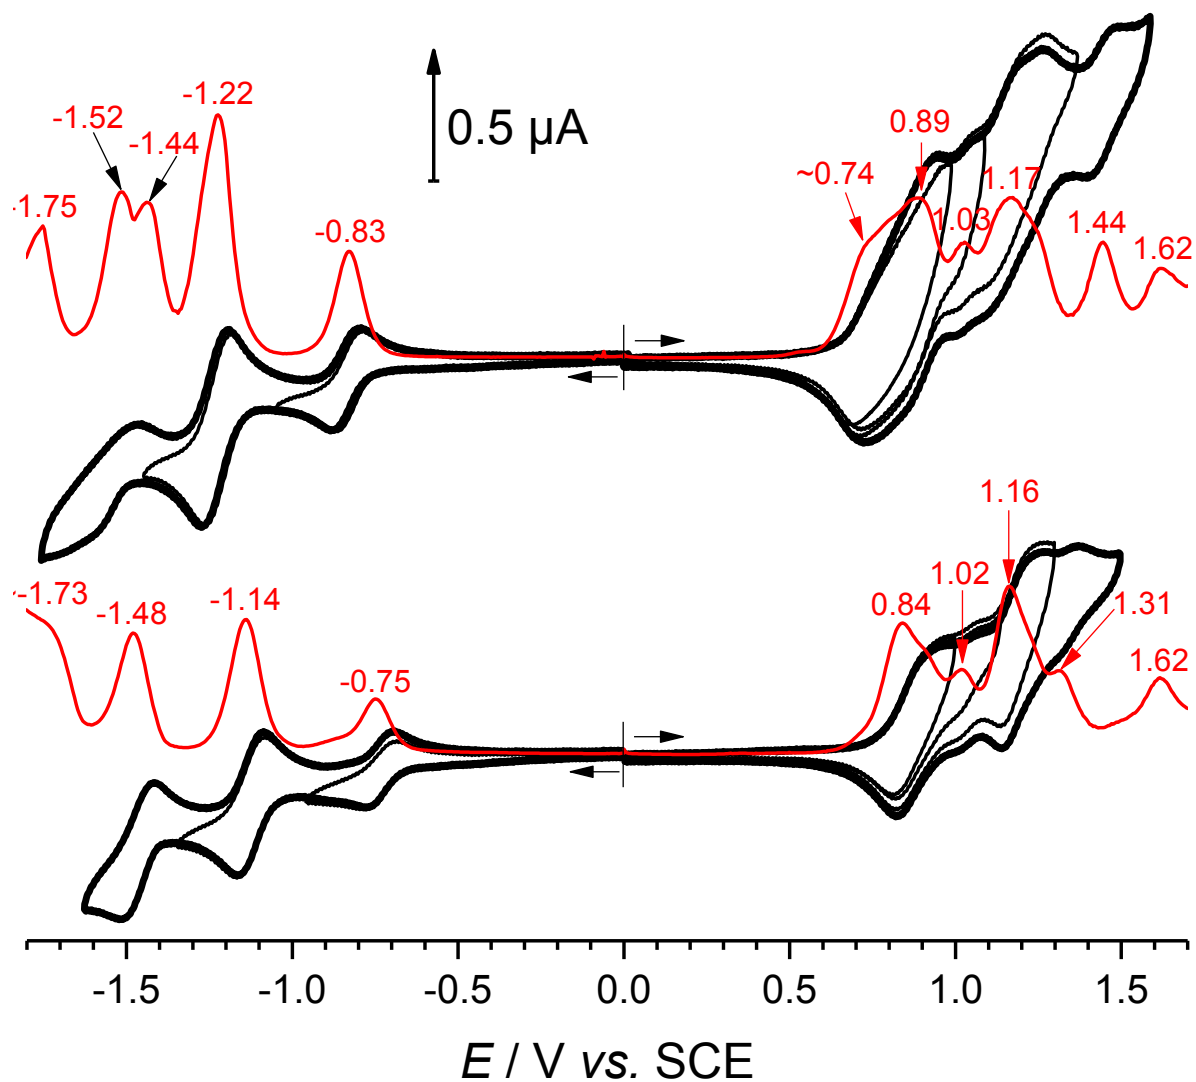

**Fig. S5.** Cyclic voltammograms (in black) and DPV curves (in red, intensities of all DPV curves have been multiplied by a factor of 2) for **BD-tPor** (top) and **BD-pPor** (bottom) in  $CH_2Cl_2$  0.1 M  $TBAPF_6$  ( $[BD-tPor]=4 \times 10^{-4}$  M and  $[BD-pPor]=2 \times 10^{-4}$  M, WE: Pt  $\varnothing=1$  mm, CE: Pt, RE: SCE,  $\nu = 100$  mV/s (CV) and 10 mV/s (DPV) respectively; subtract 0.46 V to get the potential values vs.  $Fc/Fc^+$ ).

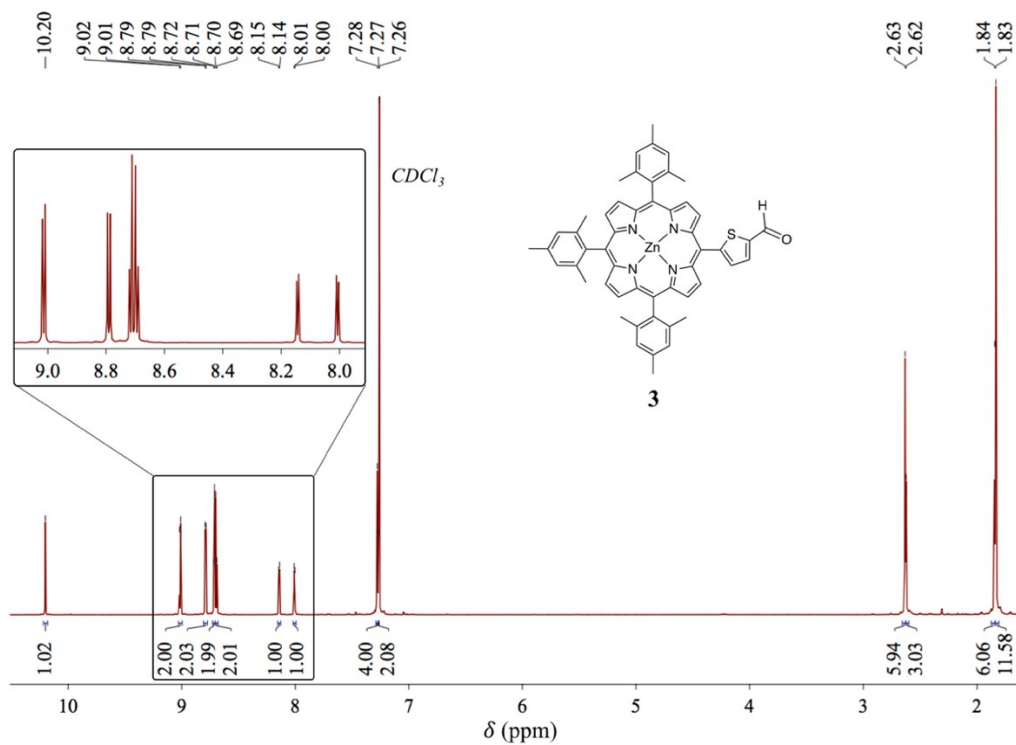

**Fig. S6.** <sup>1</sup>H NMR spectrum (CDCl<sub>3</sub>, 500 MHz) of porphyrin **3**

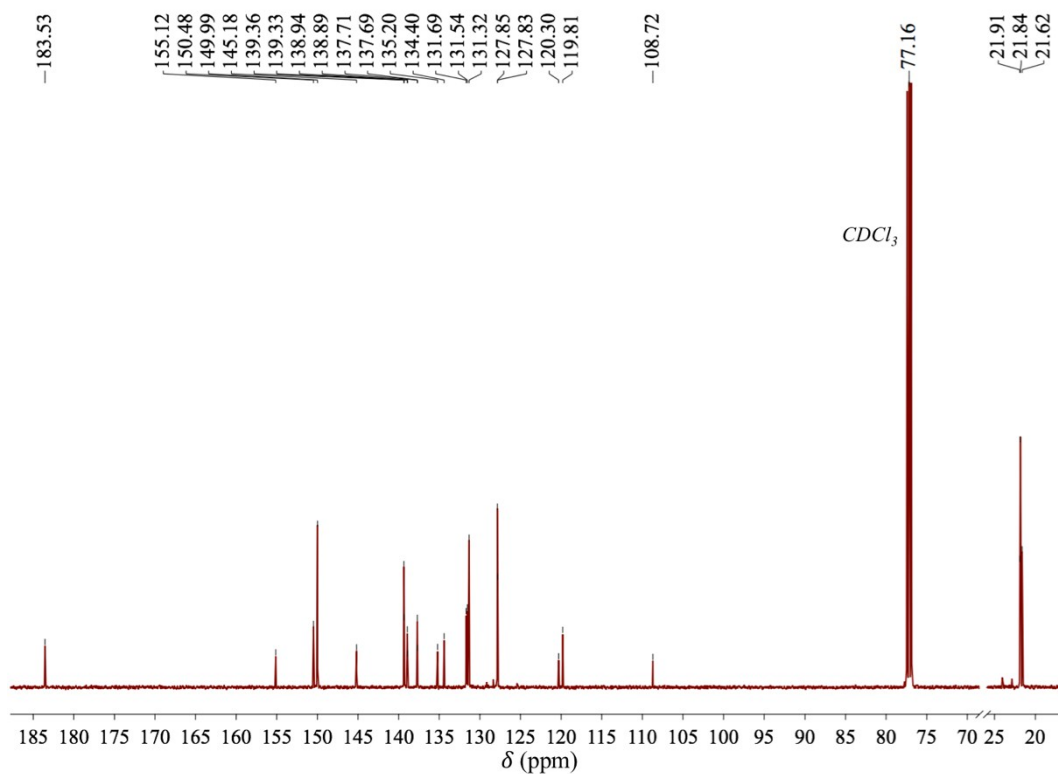

**Fig. S7.** <sup>13</sup>C NMR spectrum (CDCl<sub>3</sub>, 125 MHz) of porphyrin **3**

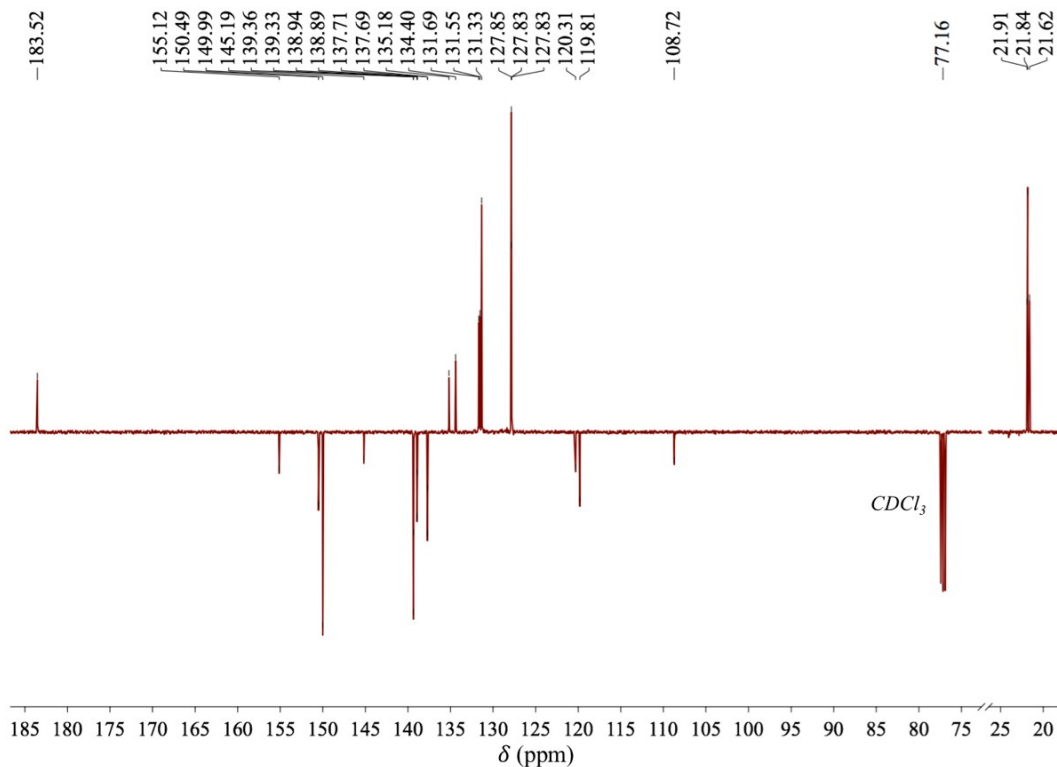

**Fig. S8.** JMOD  $^{13}\text{C}$  NMR spectrum ( $\text{CDCl}_3$ , 125 MHz) of porphyrin **3**

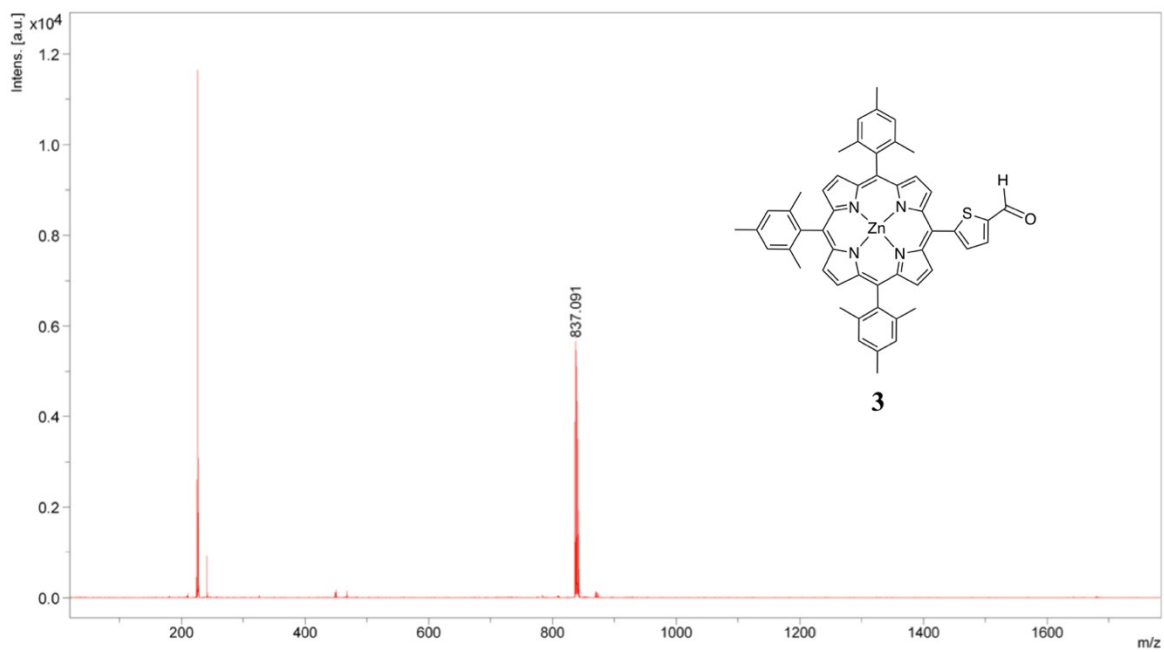

**Fig. S9.** LRMS MALDI/TOF spectrum of **3** (full)

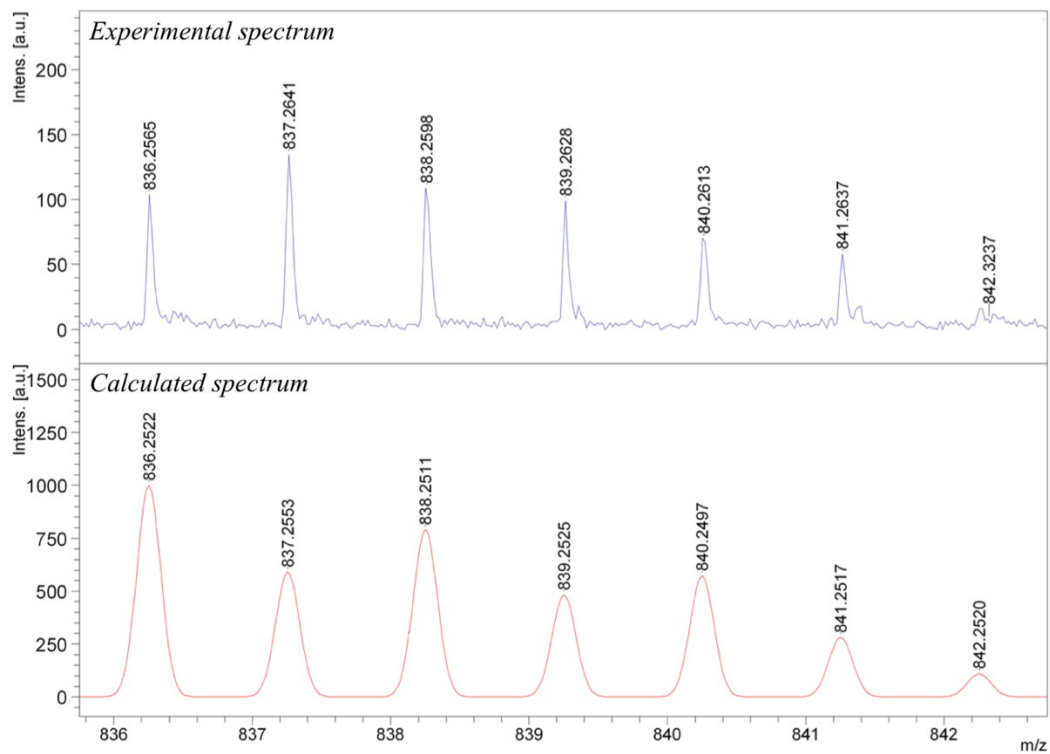

**Fig. S10.** HRMS MALDI/TOF spectrum of **3** (zoom)

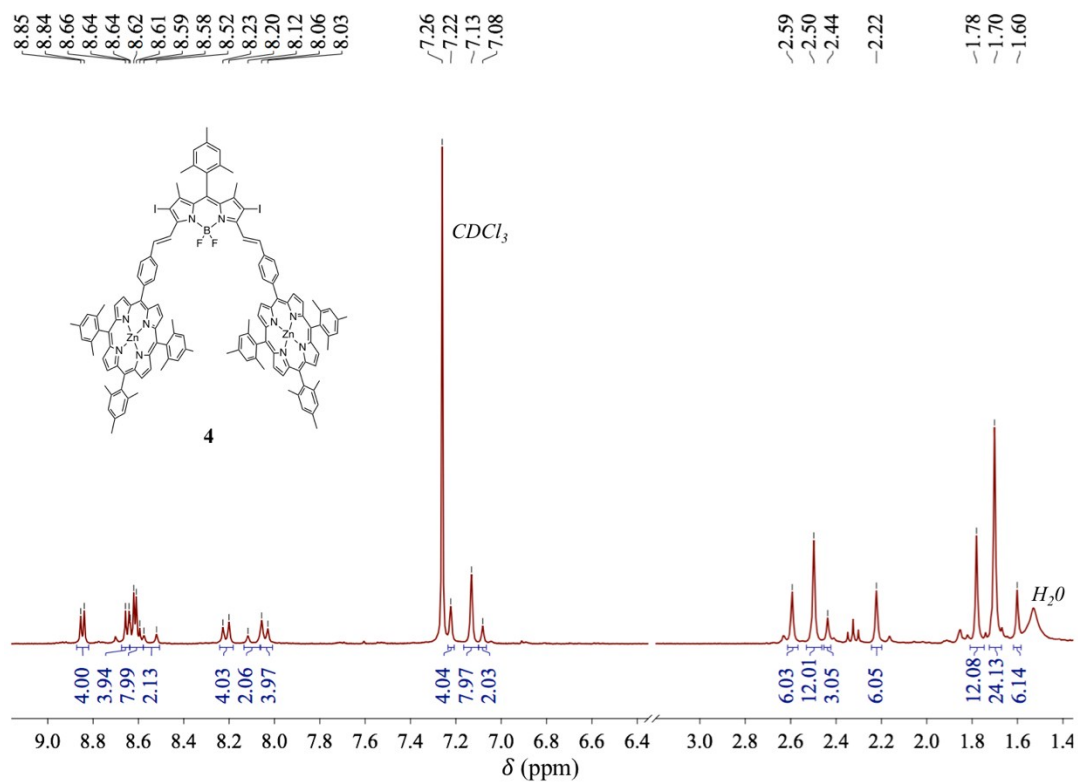

**Fig. S11.**  $^1\text{H}$  NMR spectrum ( $\text{CDCl}_3$ , 300 MHz) of **4**



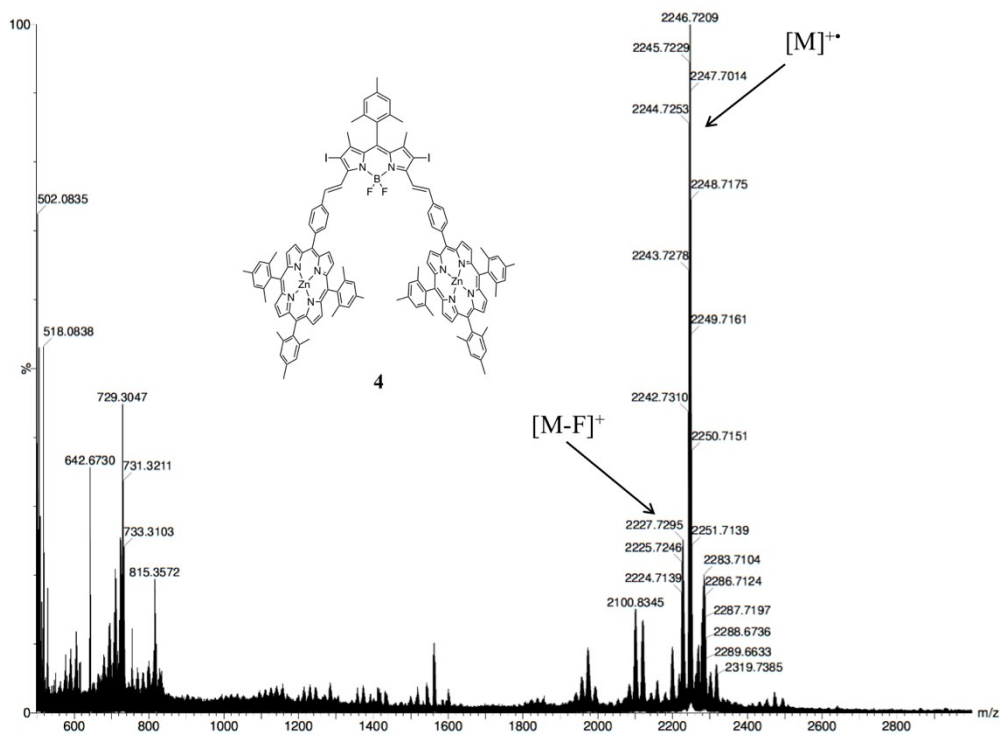

Fig. S12. LRMS MALDI/TOF spectrum of **4** (full)

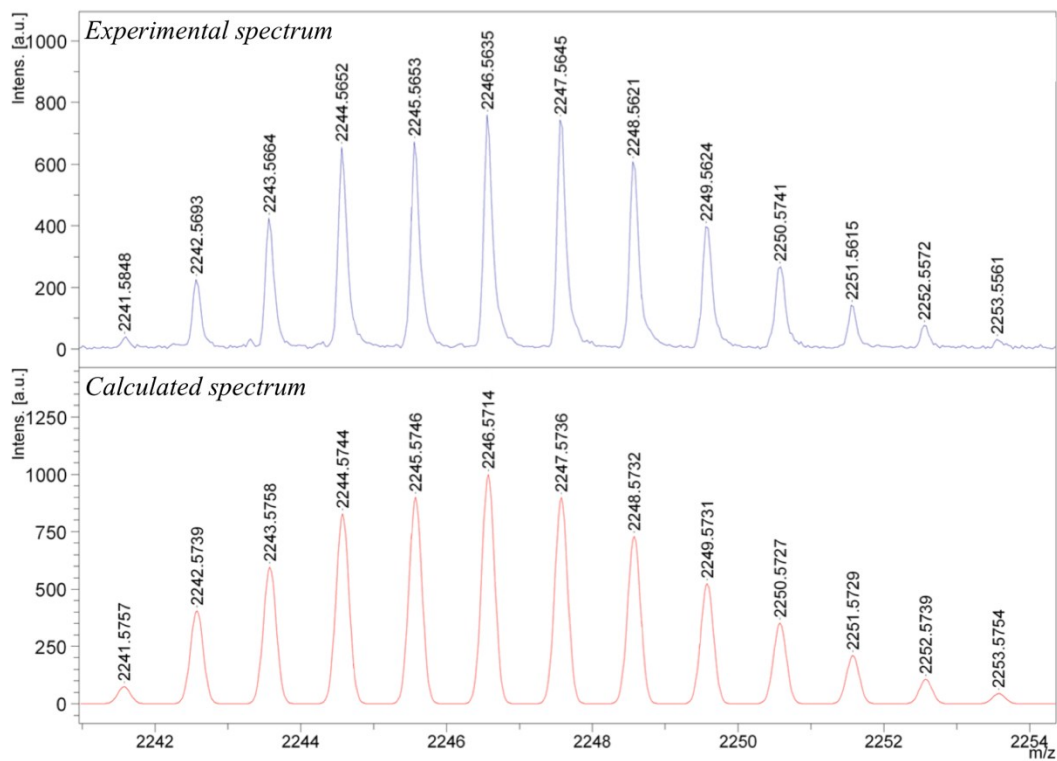

Fig. S13. HRMS MALDI/TOF spectrum of **4** (zoom)

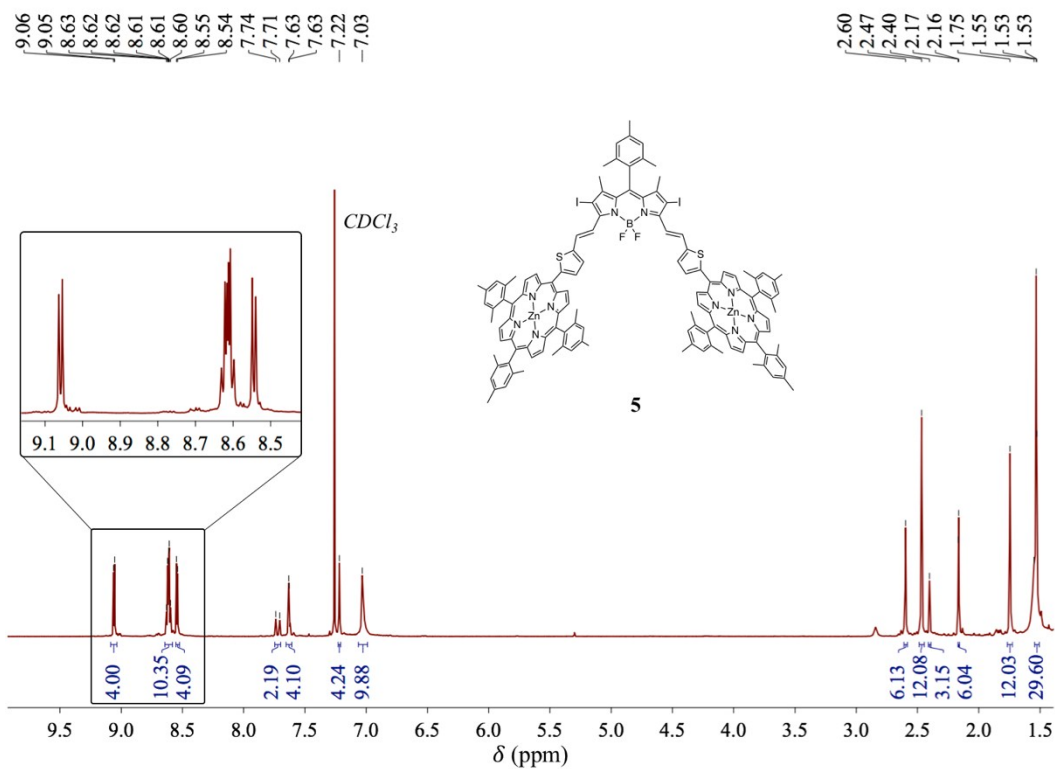

**Fig. S14.**  $^1H$  NMR spectrum ( $CDCl_3$ , 500 MHz) of **5**

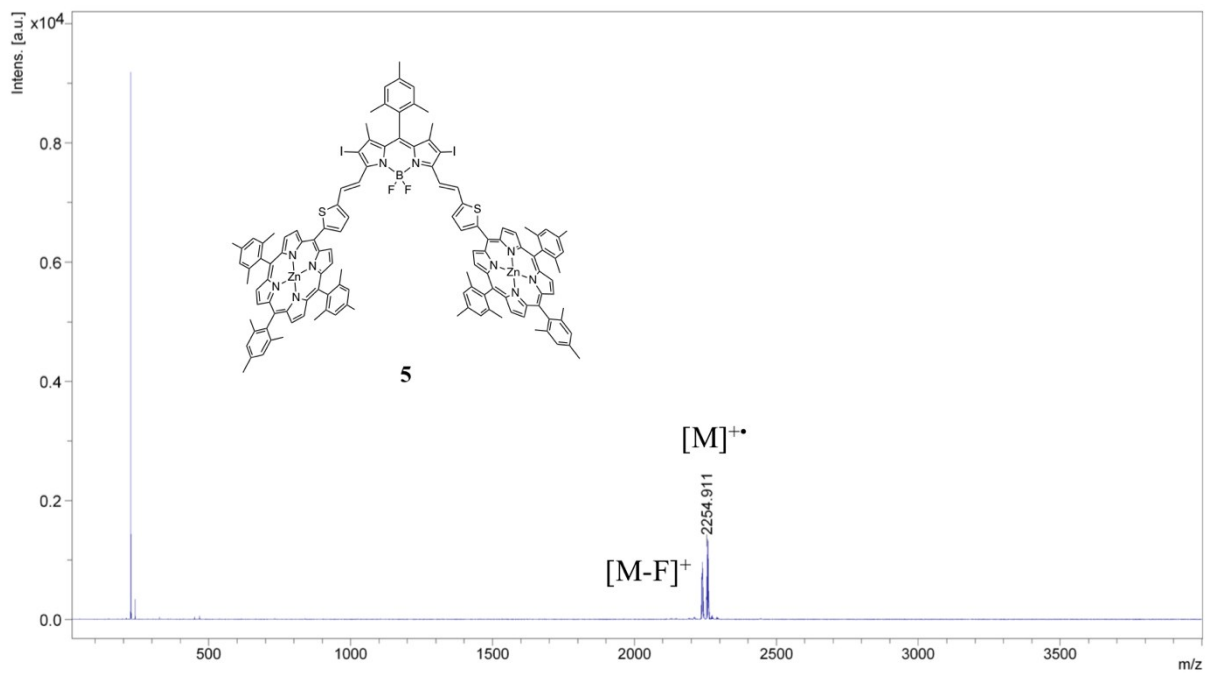

**Fig. S15.** LRMS MALDI/TOF spectrum of **5** (full)

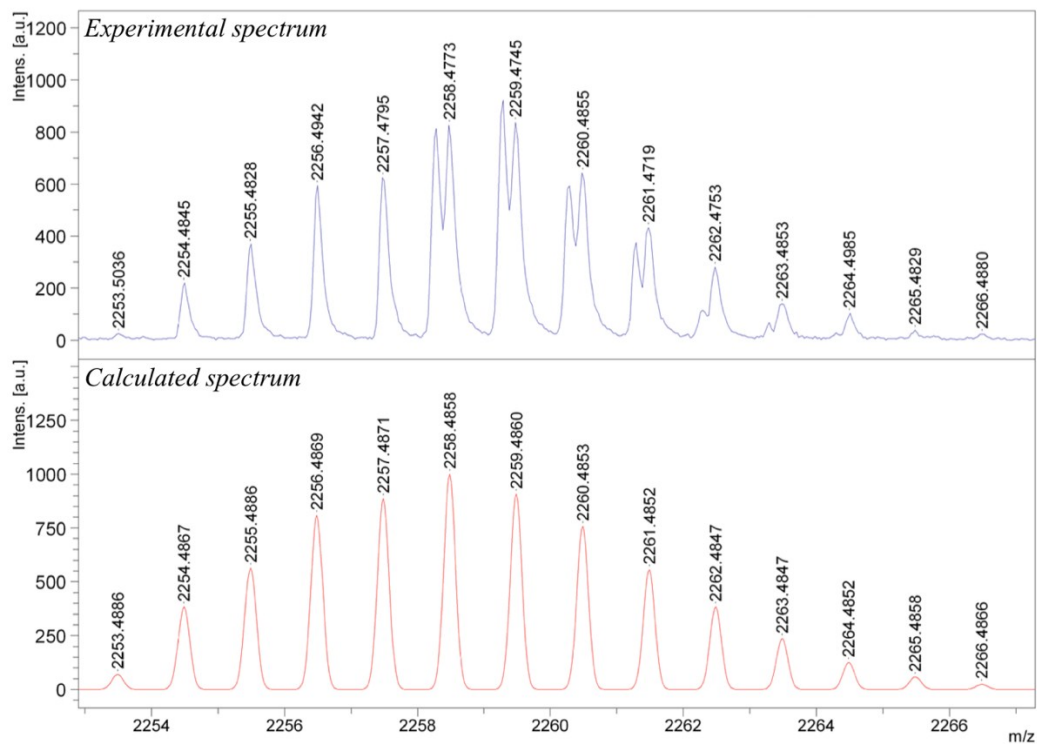

**Fig. S16.** HRMS MALDI/TOF spectrum of **5** (zoom)

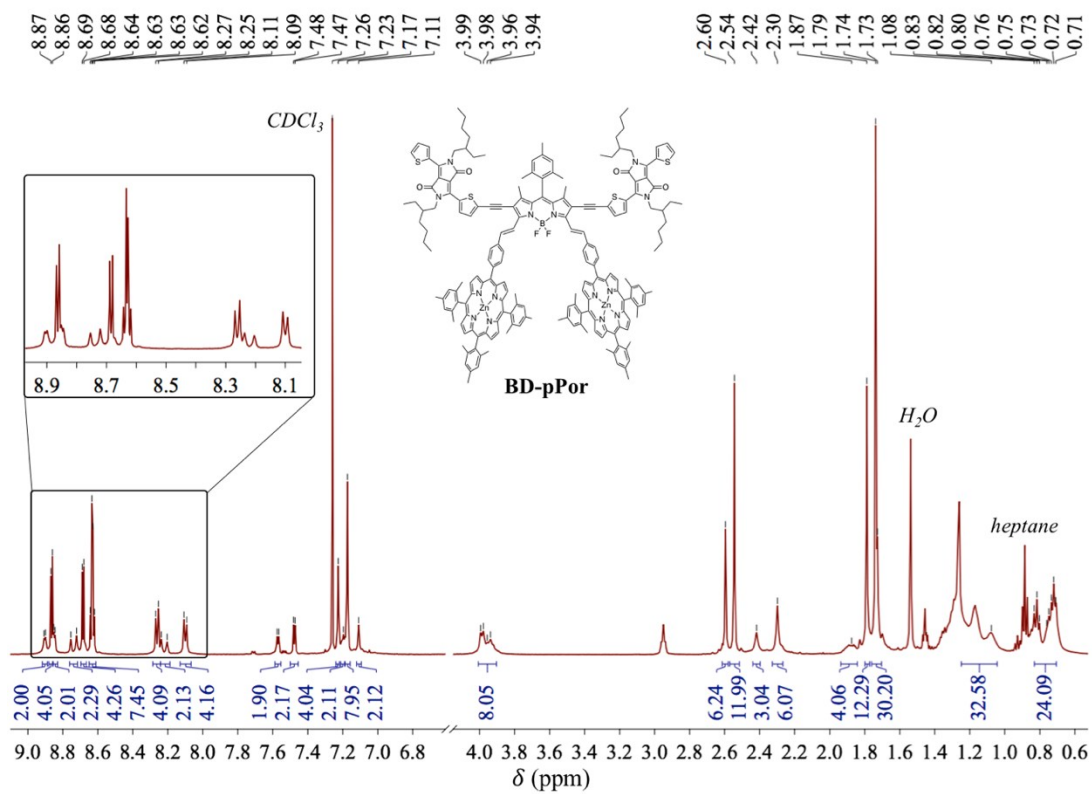

**Fig. S17.**  $^1\text{H}$  NMR spectrum ( $\text{CDCl}_3$ , 500 MHz) of **BD-pPor**

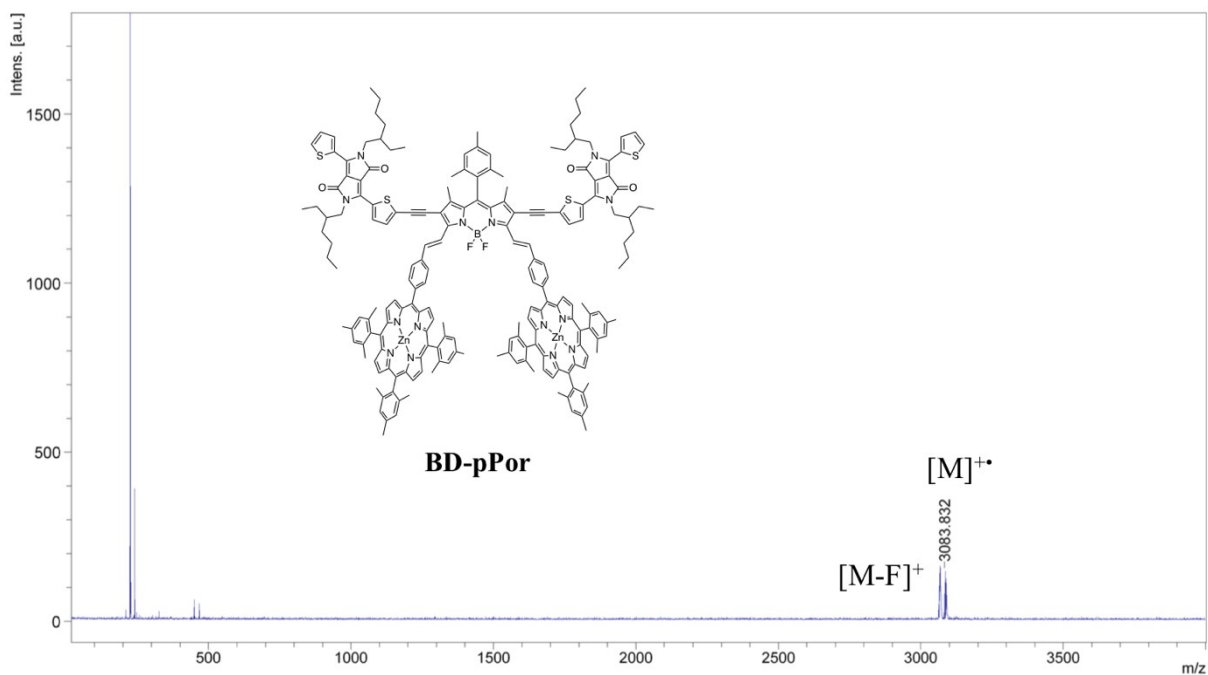

**Fig. S18.** LRMS MALDI/TOF spectrum of **BD-pPor** (full)

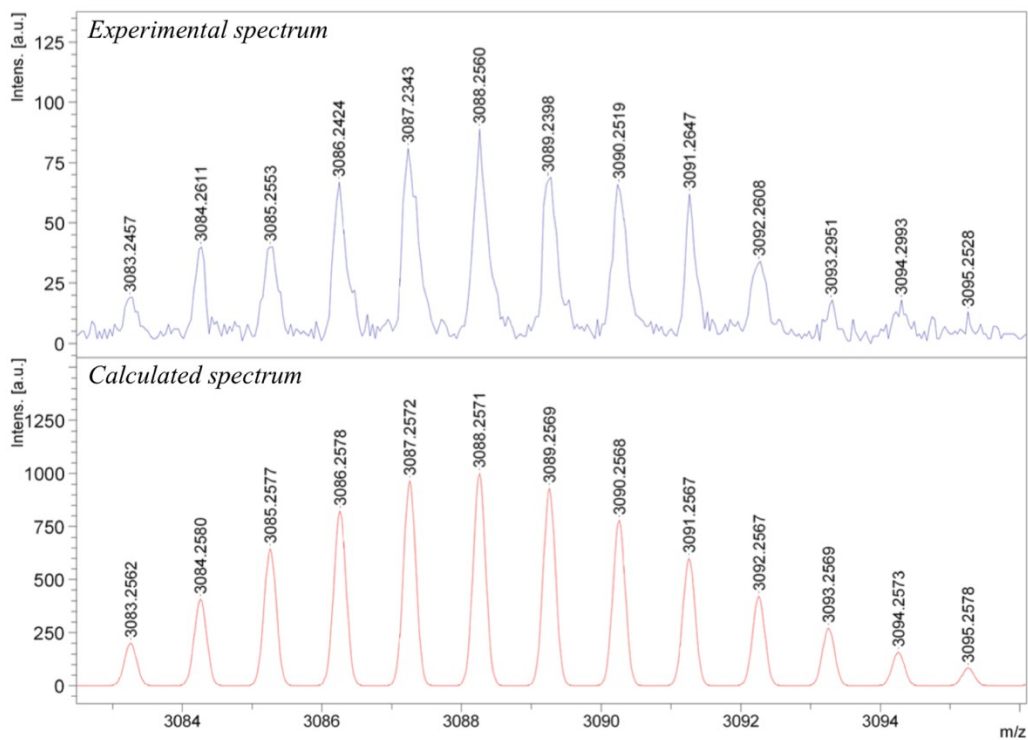

**Fig. S19.** HRMS MALDI/TOF spectrum of **BD-pPor** (zoom)

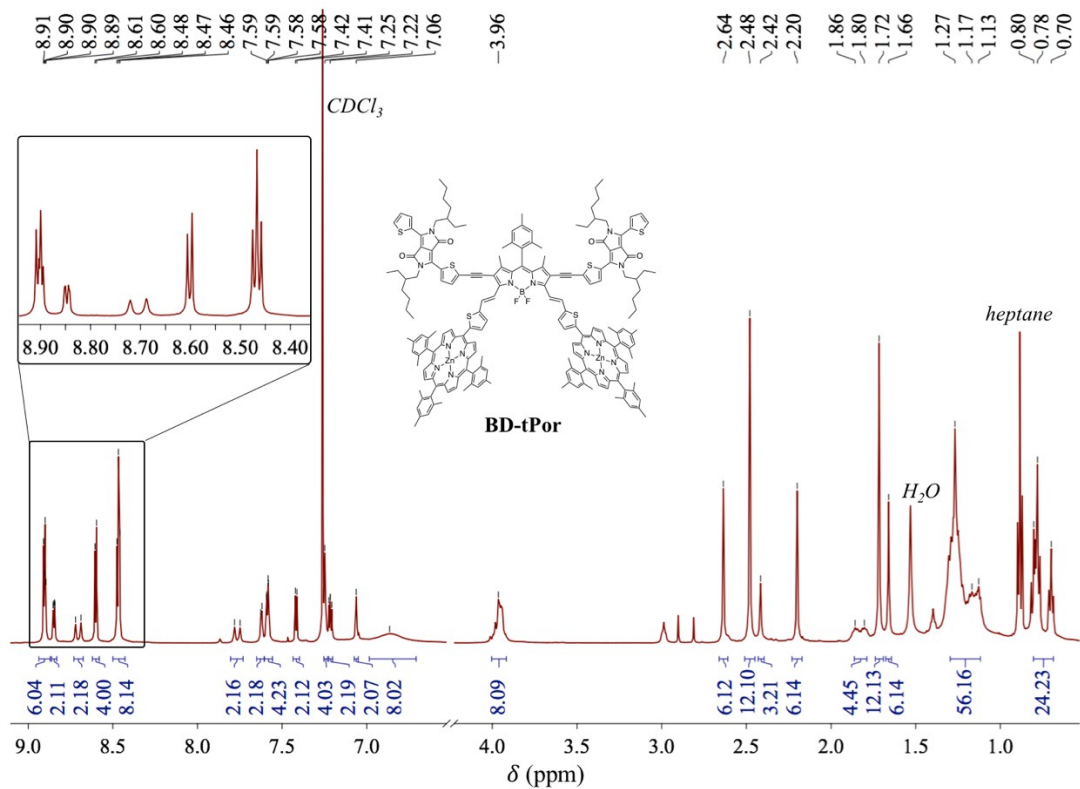

**Fig. S20.**  $^1H$  NMR spectrum ( $CDCl_3$ , 500 MHz) of **BD-tPor**

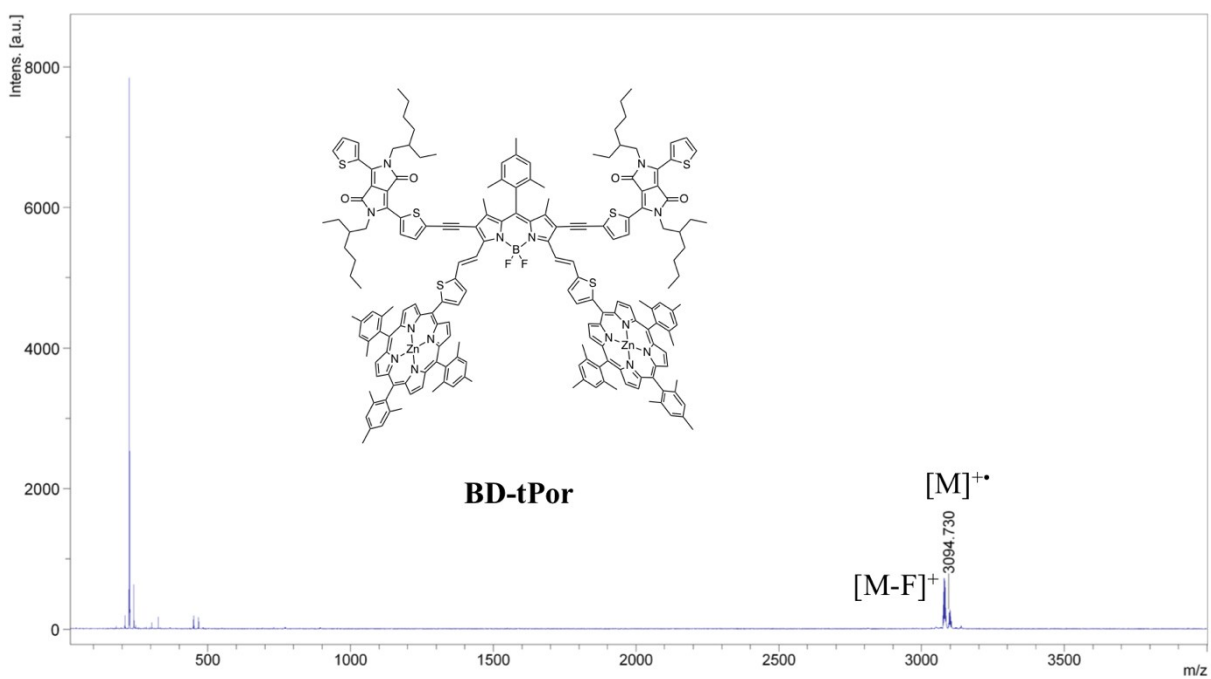

**Fig. S21.** LRMS MALDI/TOF spectrum of **BD-tPor** (full)

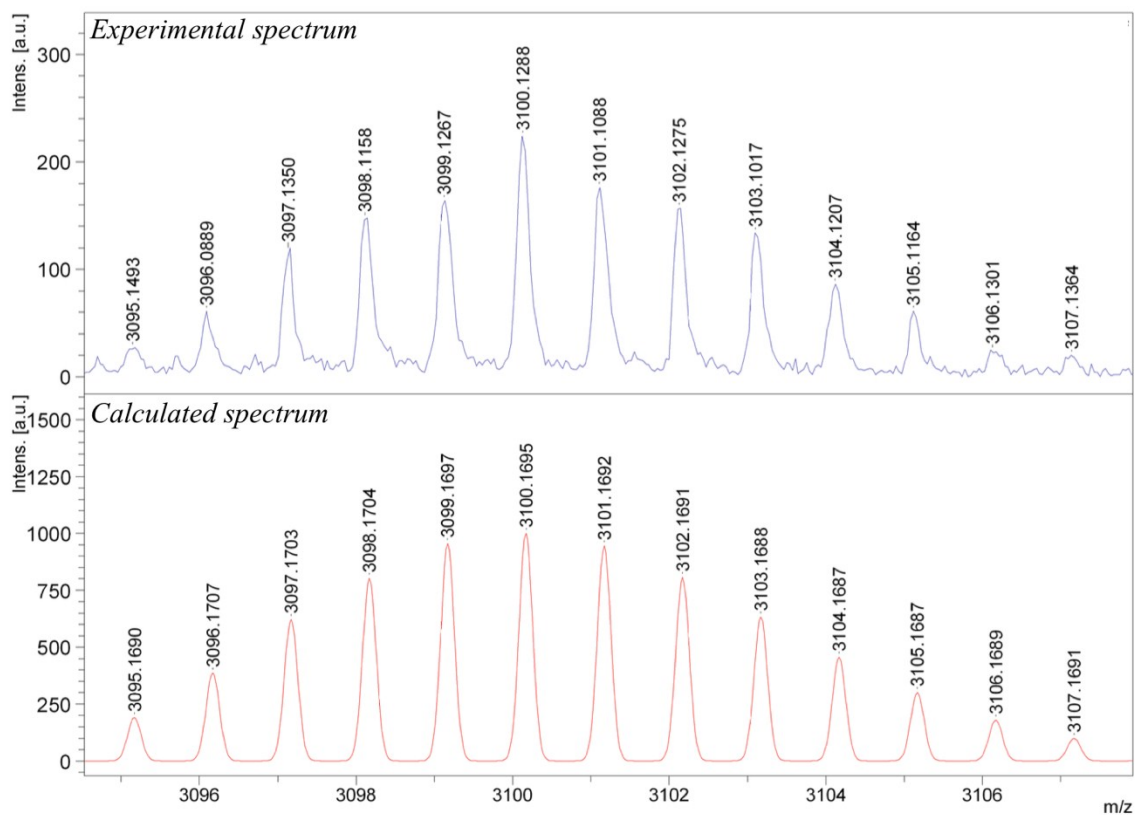

**Fig. S22.** HRMS MALDI/TOF spectrum of **BD-tPor** (zoom)

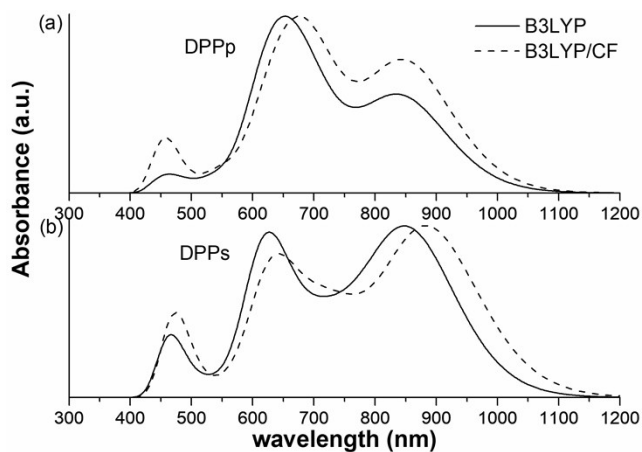

**Fig. S23.** Theoretical UV/Vis absorption spectrum of (a) **BD-pPor** and (b) **BD-tPor** (calculated using the B3LYP functional).

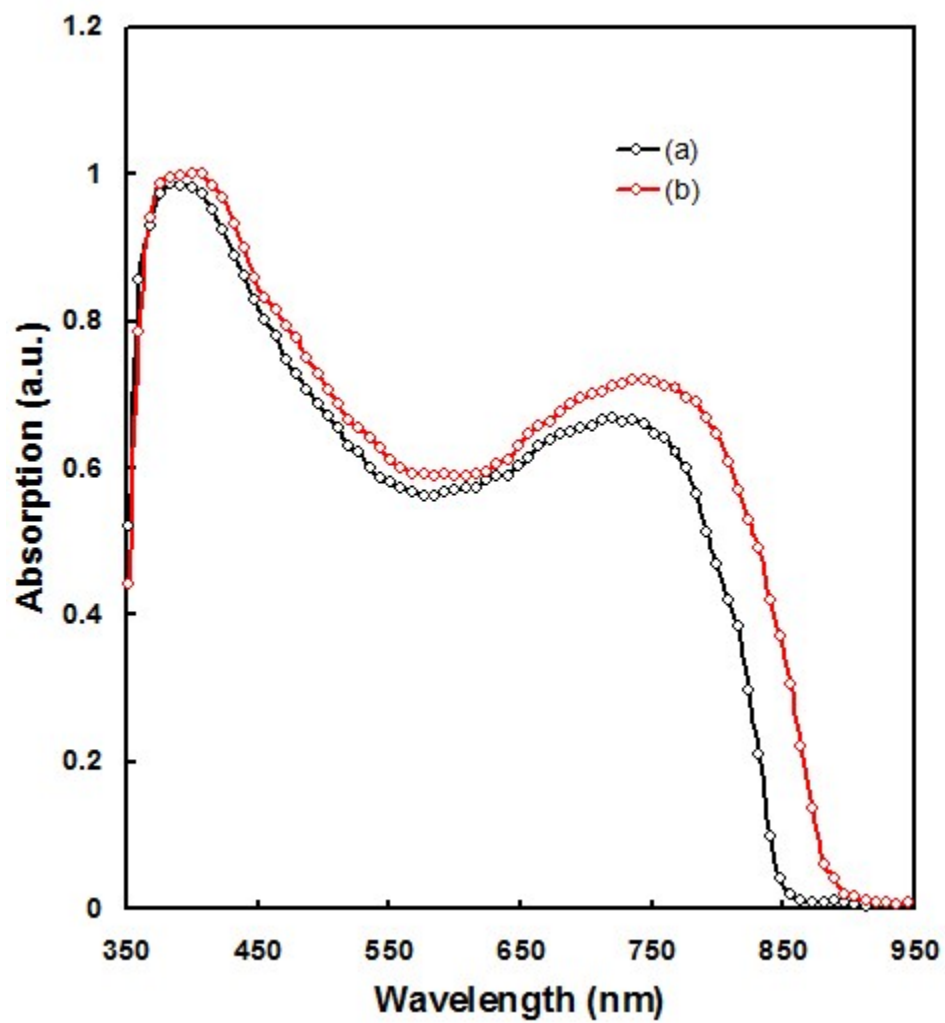

Fig. S24. Optical absorption spectra of (a) **BD-pPor**:PC<sub>71</sub>BM and (b) **BD-tPor**:PC<sub>71</sub>BM thin films

**Table S1:** Electronic excitations of **BD-pPor** (with non-negligible oscillator strengths,  $f$ ), and the corresponding major contributions. Calculated using the M06 functional (and CF for solvent).

| No. | Wavelength (nm) | $f$   | Main Contributions                                                              |
|-----|-----------------|-------|---------------------------------------------------------------------------------|
| 1   | 777.14          | 2.270 | H→L (91%)                                                                       |
| 3   | 658.82          | 0.153 | H-2→L (76%)<br>H→L+1 (14%)                                                      |
| 4   | 648.35          | 0.471 | H-3→L (55%)<br>H→L+2 (21%)<br>H→L+1 (57%)                                       |
| 5   | 642.14          | 1.264 | H-2→L (16%)<br>H-1→L+2 (15%)<br>H→L+2 (48%)                                     |
| 6   | 627.55          | 0.016 | H-3→L (34%)<br>H-1→L+1 (14%)                                                    |
| 9   | 581.57          | 0.389 | H-6→L (59%)<br>H-2→L+2 (19%)<br>H-5→L+5 (13%)                                   |
| 10  | 569.36          | 0.062 | H-3→L+1 (14%)<br>H-3→L+4 (11%)<br>H-2→L+3 (12%)<br>H-6→L (20%)                  |
| 11  | 565.39          | 0.010 | H-4→L+6 (16%)<br>H-2→L+1 (14%)<br>H-3→L+3 (12%)<br>H-4→L (26%)<br>H-3→L+6 (23%) |
| 13  | 556.78          | 0.019 | H-4→L+4 (17%)<br>H-4→L+3 (11%)<br>H-2→L+6 (11%)<br>H-1→L+2 (27%)                |
| 14  | 556.08          | 0.068 | H-2→L+1 (12%)<br>H→L+1 (11%)<br>H-5→L (31%)                                     |
| 15  | 555.83          | 0.018 | H-2→L+5 (17%)<br>H-5→L+3 (16%)<br>H-3→L+5 (12%)                                 |
| 22  | 492.08          | 0.229 | H→L+3 (72%)                                                                     |
| 23  | 490.73          | 0.014 | H-6→L+1 (83%)                                                                   |
| 31  | 454.94          | 0.095 | H-1→L+4 (53%)<br>H-2→L+3 (31%)<br>H-10→L (48%)                                  |
| 34  | 449.32          | 0.019 | H-8→L (17%)<br>H-3→L+3 (12%)<br>H-3→L+4 (21%)                                   |
| 36  | 444.04          | 0.064 | H-1→L+4 (21%)<br>H-2→L+4 (19%)<br>H-2→L+3 (15%)                                 |
| 37  | 443.10          | 0.636 | H-7→L (78%)                                                                     |



**Table S2:** Electronic excitations of **BD-tPor** (with non-negligible oscillator strengths,  $f$ ), and the corresponding major contributions. Calculated using the M06 functional (and CF for solvent).

| No. | Wavelength (nm) | $f$   | Main Contributions                                               |
|-----|-----------------|-------|------------------------------------------------------------------|
| 1   | 826.12          | 2.568 | H→L (93%)                                                        |
| 2   | 682.66          | 0.580 | H→L+1 (58%)<br>H-2→L (25%)                                       |
| 3   | 674.27          | 0.548 | H→L+2 (54%)<br>H-3→L (23%)                                       |
| 4   | 665.15          | 0.157 | H-1→L (92%)                                                      |
| 5   | 657.11          | 0.381 | H-2→L (68%)<br>H→L+1 (22%)                                       |
| 6   | 639.49          | 0.053 | H-3→L (71%)<br>H→L+2 (23%)<br>H-2→L+1 (25%)                      |
| 8   | 589.89          | 0.657 | H-4→L (14%)<br>H-6→L (12%)<br>H-1→L+2 (12%)                      |
| 9   | 589.14          | 0.268 | H-4→L (22%)<br>H-2→L+2 (28%)                                     |
| 10  | 583.10          | 0.027 | H-1→L+1 (21%)<br>H-3→L+1 (12%)                                   |
| 11  | 576.24          | 0.041 | H→L+3 (34%)<br>H-1→L+1 (12%)                                     |
| 14  | 553.55          | 0.012 | H-4→L (34%)<br>H-5→L (19%)                                       |
| 15  | 552.14          | 0.029 | H-5→L (36%)<br>H-4→L (13%)<br>H→L+3 (36%)                        |
| 18  | 521.53          | 0.130 | H-3→L+4 (13%)<br>H-2→L+2 (12%)<br>H-2→L+3 (12%)<br>H-2→L+2 (39%) |
| 20  | 517.46          | 0.011 | H-3→L+1 (20%)<br>H-3→L+2 (17%)<br>H→L+4 (45%)                    |
| 21  | 514.22          | 0.020 | H-3→L+2 (14%)<br>H-3→L+3 (14%)<br>H-5→L+1 (40%)                  |
| 22  | 505.07          | 0.021 | H→L+5 (34%)<br>H-4→L+2 (14%)<br>H→L+6 (35%)                      |
| 23  | 504.55          | 0.026 | H-4→L+1 (22%)<br>H-4→L+2 (17%)                                   |

|    |        |       |                                                                             |
|----|--------|-------|-----------------------------------------------------------------------------|
| 24 | 499.07 | 0.015 | H-5→L+2 (14%)<br>H-4→L+2 (29%)<br>H→L+5 (16%)<br>H→L+6 (12%)<br>H→L+6 (22%) |
| 25 | 498.27 | 0.013 | H→L+5 (16%)<br>H-5→L+1 (14%)                                                |
| 27 | 487.63 | 0.041 | H-6→L+2 (77%)                                                               |
| 29 | 476.48 | 0.130 | H-1→L+4 (56%)<br>H-2→L+3 (26%)                                              |
| 32 | 463.42 | 0.408 | H-7→L (77%)<br>H→L+7 (10%)                                                  |
| 33 | 462.54 | 0.025 | H-1→L+5 (51%)<br>H-1→L+6 (21%)<br>H-2→L+6 (15%)                             |
| 34 | 462.09 | 0.106 | H-1→L+6 (43%)<br>H-2→L+5 (21%)<br>H-1→L+5 (17%)<br>H-3→L+3 (25%)            |
| 35 | 454.40 | 0.034 | H-2→L+4 (24%)<br>H-8→L (20%)                                                |
| 36 | 452.83 | 0.110 | H-2→L+3 (30%)<br>H-1→L+4 (21%)<br>H-3→L+4 (12%)                             |
| 37 | 449.23 | 0.537 | H→L+7 (51%)<br>H-3→L+4 (21%)                                                |
| 38 | 448.49 | 0.016 | H-8→L (61%)<br>H-2→L+4 (19%)                                                |

---
